# Supplementary material for: Evaluation of protein secondary structure from FTIR spectra improved after partial deuteration
Source: PubMed Central journal article supplement (PMC8189984; doi:10.1007/s00249-021-01502-y), 2021-02-03
Supplement: 249_2021_1502_MOESM1_ESM.pdf [file 249_2021_1502_MOESM1_ESM.pdf]

## Supplementary materials for

# Evaluation of protein secondary structure from FTIR spectra improved after partial deuteration

**Joëlle De Meutter and Erik Goormaghtigh**

Center for Structural Biology and Bioinformatics, Laboratory for the Structure and Function of Biological Membranes, Campus Plaine CP206/02; Université Libre de Bruxelles, B1050 Brussels, Belgium

### Table of Contents

|                                                                                                                |    |
|----------------------------------------------------------------------------------------------------------------|----|
| Table S1: list of 25 proteins included in the Kennard-Stone test set .....                                     | S2 |
| Figure S1: HDX spectra of myoglobin and metallothionein .....                                                  | S4 |
| Figure S2: Reproducibility: quadruplicate spectra of myoglobin and metallothionein at $t_0$ and $t_{15}$ ..... | S5 |
| Figure S3: predicted versus actual secondary structure contents obtained by PLS .....                          | S6 |
| Figure S4: predicted versus actual secondary structure contents obtained by SVM.....                           | S7 |
| Figure S5: ASLR determination of secondary structures .....                                                    | S8 |

**Table S1: list of 25 proteins included in the Kennard-Stone test set**

| Protein name                               | PDB name | Kennard-Stone selection |                 |         |                |        |
|--------------------------------------------|----------|-------------------------|-----------------|---------|----------------|--------|
|                                            |          | a-helix                 | ordered a-helix | b-sheet | anti// b-sheet | Others |
| Aldolase A                                 | 1ZAH     |                         |                 |         |                |        |
| Alpha-2-Macroglobulin                      | 4ACQ     |                         | X               | X       | X              |        |
| Alpha-Crystallin B chain                   | 2YGD     |                         |                 | X       |                |        |
| Amidase                                    | 2UXY     |                         |                 | X       |                |        |
| Amino acid oxidase, D-                     | 1VE9     |                         |                 |         |                |        |
| Apolipoprotein E3                          | 1H7I     | X                       | X               |         |                | X      |
| Apo-Transferrin                            | 4HOW     |                         |                 |         |                |        |
| Aprotinin (Trypsin inhibitor Kunitz type ) | 4Y0Y     | X                       | X               | X       |                | X      |
| Avidin                                     | 1VYO     |                         |                 |         | X              |        |
| Beta-Amylase                               | 1FA2     |                         |                 |         | X              |        |
| Beta-Galactosidase                         | 5A1A     |                         |                 | X       | X              |        |
| Beta-Glucunoridase                         | 3LPF     |                         |                 |         |                |        |
| Beta-Lactamase TEM                         | 1XPB     | X                       |                 |         | X              |        |
| Beta-Lactoglobulin                         | 3NPO     | X                       |                 | X       |                |        |
| Bowman-Birk proteinase inhibitor           | 5J4Q     |                         |                 |         |                | X      |
| Calmodulin                                 | 1PRW     | X                       | X               | X       |                |        |
| Carbonic anhydrase 1                       | 1HCB     |                         |                 |         | X              |        |
| Carbonic anhydrase 2                       | 1V9E     | X                       | X               |         |                | X      |
| Carboxyl esterase                          | 1K4Y     |                         |                 |         |                |        |
| Carboxypeptidase A1                        | 2CTB     |                         |                 | X       |                |        |
| Carboxypeptidase Y                         | 1YSC     |                         |                 |         |                |        |
| Catalase                                   | 3RGP     |                         | X               |         |                |        |
| Ceruloplsamin                              | 4ENZ     |                         |                 |         |                |        |
| Choline oxidase                            | 4MJW     | X                       |                 |         |                |        |
| Chymotripsinogen A                         | 2CGA     |                         |                 |         | X              |        |
| Citrate synthase                           | 3ENJ     | X                       |                 |         |                | X      |
| Concanavalin A (Lectin)                    | 1I3H     |                         |                 |         | X              | X      |
| Creatine (phospho)kinase                   | 1U6R     |                         |                 |         |                |        |
| Cytochrome c                               | 1HRC     |                         |                 |         |                |        |
| Deoxyribonuclease-1                        | 3DNI     |                         |                 |         | X              | X      |
| DT-diaphorase                              | 1D4A     |                         |                 |         |                | X      |
| Elastase                                   | 1QNJ     |                         |                 | X       |                |        |
| Endo-1,4-beta-xylanase                     | 2JIC     | X                       |                 | X       | X              |        |
| Enolase                                    | 1EBH     |                         |                 |         |                |        |
| Galactose oxidase                          | 2EIE     |                         |                 | X       | X              |        |
| Gelonin                                    | 3KTZ     | X                       |                 |         | X              |        |
| Glucagon                                   | 1NAU     |                         | X               |         |                | X      |
| Glucose Oxidase                            | 1CF3     | X                       |                 |         |                | X      |
| Glutamate oxaloacetate transaminase 1      | 5TOQ     | X                       |                 |         |                |        |
| Glutathione Reductase                      | 3DJG     |                         |                 |         | X              |        |
| Glyceraldehyde-3-phosphate dehydrogenase   | 1J0X     |                         |                 | X       |                |        |
| Glycogen phosphorylase-b                   | 1AXR     |                         |                 |         |                | X      |
| Hemoglobin                                 | 2QSP     |                         |                 |         |                | X      |
| Hexokinase                                 | 1IG8     |                         |                 |         |                | X      |
| Immunoglobuling G                          | 1HZH     | X                       |                 | X       | X              | X      |
| Insulin (neat)                             | 3W7Y     |                         | X               |         | X              |        |
| Lactate Dehydrogenase                      | 3H3F     |                         |                 |         |                |        |
| Lactoferrin (Lactotransferrin) human       | 1CB6     |                         |                 | X       |                | X      |

|                                      |      |   |   |   |   |   |
|--------------------------------------|------|---|---|---|---|---|
| Lactoferrin bovin                    | 1BLF |   | X |   |   |   |
| Lactoperoxidase                      | 6A4Y |   |   | X |   |   |
| Lectin                               | 1LEN |   |   | X |   |   |
| Leptin                               | 1AX8 | X | X |   |   | X |
| Lipoxidase                           | 1F8N |   |   |   |   |   |
| Lysostaphin                          | 4LXC |   |   | X | X | X |
| Lysozyme                             | 4LZT |   | X |   |   |   |
| Metallothionein-2A                   | 4MT2 |   |   |   |   | X |
| Micrococcal Nuclease                 | 1EY0 | X |   |   |   |   |
| Myoglobin                            | 1WLA | X | X |   |   | X |
| Ovalbumin                            | 1OVA |   |   | X | X | X |
| Ovotransferrin (Conalbumin)          | 1OVT |   |   | X |   |   |
| Pepsin A                             | 4PEP |   | X |   |   |   |
| Pepsinogen                           | 2PSG | X |   |   |   |   |
| Peroxidase                           | 1HCH |   | X |   |   |   |
| Phosphatase, Alkaline                | 1Y6V |   |   |   | X |   |
| Phosphoglucomutase 1                 | 5EPC |   |   |   | X |   |
| Phosphoglycerate kinase              | 1QPG | X |   |   |   |   |
| Phospholipase A2                     | 2OSH | X | X |   |   |   |
| Protein disulfide isomerase          | 4EL1 | X | X |   | X |   |
| Pyrophosphatase inorganic            | 1I40 | X |   |   |   | X |
| Pyruvate Kinase                      | 1A49 |   | X |   |   |   |
| Ribonuclease A                       | 1KF5 |   | X | X |   |   |
| Ribonuclease T1                      | 1RLS |   |   |   |   |   |
| Serum Albumin                        | 1N5U | X |   | X | X | X |
| SilB-C                               | 2L55 |   |   |   | X |   |
| Silb-NM2                             | 5A4G |   |   |   | X |   |
| Subtilisin Calsberg                  | 3UNX | X |   |   | X |   |
| Superoxide Dismutase (Fe)            | 1ISA | X | X | X |   |   |
| Superoxide Dismutase (CU Zn)         | 1Q0E |   | X |   |   | X |
| Thaumatococcus                       | 3AOK |   | X | X |   |   |
| Transketolase                        | 2R8O |   |   | X |   |   |
| Transthyretin (Préalbumin)           | 1TTA |   | X | X |   | X |
| Triose Phosphate Isomerase           | 1YPI |   | X |   |   |   |
| Trypsin inhibitor A Kunitz type SBTI | 1BA7 | X | X |   | X | X |
| Ubiquitin                            | 2WWZ |   |   |   |   |   |
| ZneB                                 | 3LNN |   | X |   |   |   |

Table S1: alphabetically sorted list of the 85 proteins included in the study along with the selection by the Kennard-Stone algorithm of a 25-protein test set for  $\alpha$ -helix, ordered helices,  $\beta$ -sheet, antiparallel  $\beta$ -sheet and “Others” Further information can be found in (De Meutter and Goormaghtigh, 2020) including source organism, expression system if any, commercial reference of the product, Swiss-Prot entry, UniProtKB accession number, PDB entry, resolution of the structure, molecular weight, isoelectric pH, extinction coefficient at 280 nm, content, all secondary structure contents and all 20 amino acid content.

#### Reference

De Meutter J, Goormaghtigh E (2020) A convenient protein library for spectroscopic calibrations. *Comput Struct Biotechnol J* 18:1864–1876. <https://doi.org/10.1016/j.csbj.2020.07.001>

**Figure S1: HDX spectra of myoglobin and metallothionein**

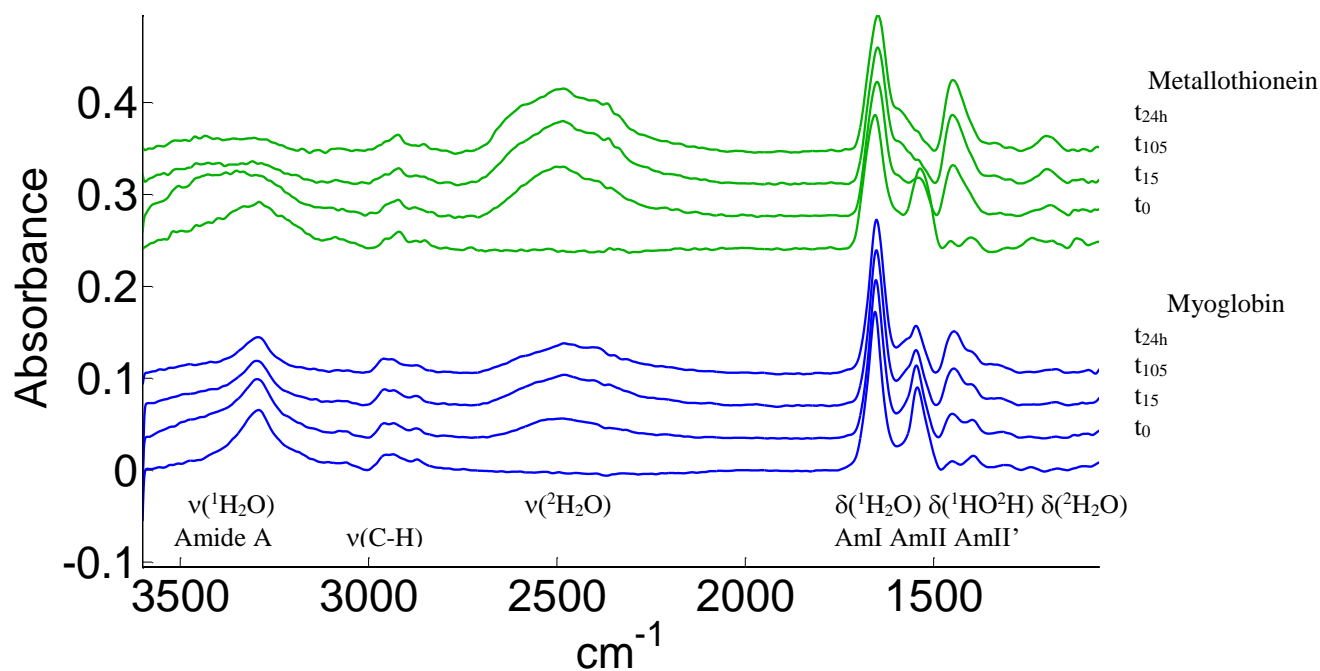

Figure S1: Spectra of myoglobin (blue) and metallothionein (green) recorded at  $t_0$ ,  $t_{15}$ ,  $t_{105}$ ,  $t_{24h}$  as indicated on the figure.  $\nu(^1\text{H}_2\text{O})$  at 3300-3500  $\text{cm}^{-1}$  refers to  $\nu(\text{O}-^1\text{H})$  in water, overlapped by the protein amide A band,  $\nu(^2\text{H}_2\text{O})$  at 2500  $\text{cm}^{-1}$  refers to  $\nu(\text{O}-^2\text{H})$  in heavy water,  $\delta(^1\text{H}_2\text{O})$  near 1640  $\text{cm}^{-1}$  refers to  $\delta(\text{O}-^1\text{H})$  in water,  $\delta(^1\text{HO}^2\text{H})$  near 1450  $\text{cm}^{-1}$  to bending in the mixed molecule  $^1\text{HO}^2\text{H}$  and  $\delta(^2\text{H}_2\text{O})$  near 1200  $\text{cm}^{-1}$  to  $\delta(\text{O}-^2\text{H})$  in heavy water. Amide I occurs near 1650  $\text{cm}^{-1}$ , amide II near 1545  $\text{cm}^{-1}$  and amide II' near 1450  $\text{cm}^{-1}$ .

**Figure S2: Reproducibility: quadruplicate spectra of myoglobin and metallothionein at  $t_0$  and  $t_{15}$**

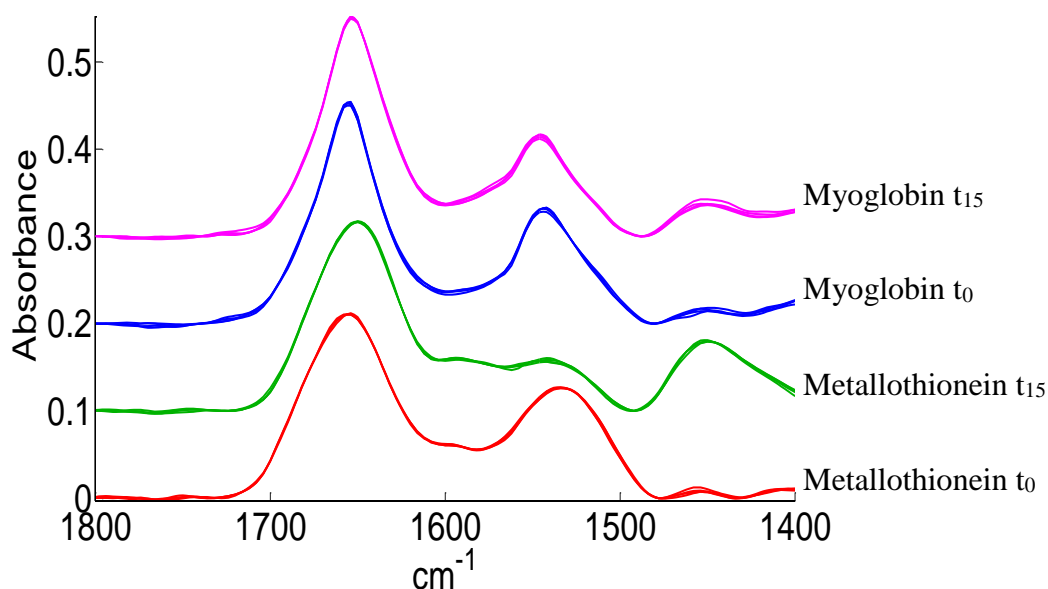

Figure S2: myoglobin and metallothionein spectra are presented at  $t_0$  and  $t_{15}$  as indicated in the right margin of the figure. Each condition, represented by a different color, is reproduced in quadruplicate. For the sake of the clarity, each group of 4 spectra has been shifted by 0.1 absorbance unit with respect to the previous one. Spectra have been normalized on the amide I region by vector normalization.

A accurate evaluation of the position of the maximum is obtained after curve fitting of the maximum of the amide I band by a 3<sup>rd</sup> order polynomial. The mean position of the amide I maximum is presented below with the standard deviation.

| Condition                | Mean $\pm$ standard deviation |
|--------------------------|-------------------------------|
| metallothionein $t_0$    | 1655.2 $\pm$ 0.8              |
| metallothionein $t_{15}$ | 1650.1 $\pm$ 0.8              |
| myoglobin $t_0$          | 1655.5 $\pm$ 0.3              |
| myoglobin $t_{15}$       | 1653.2 $\pm$ 0.1              |

Position of the amide I maximum  $\pm$  the standard deviation for the quadruplicates

**Figure S3: predicted versus actual secondary structure contents obtained by PLS**

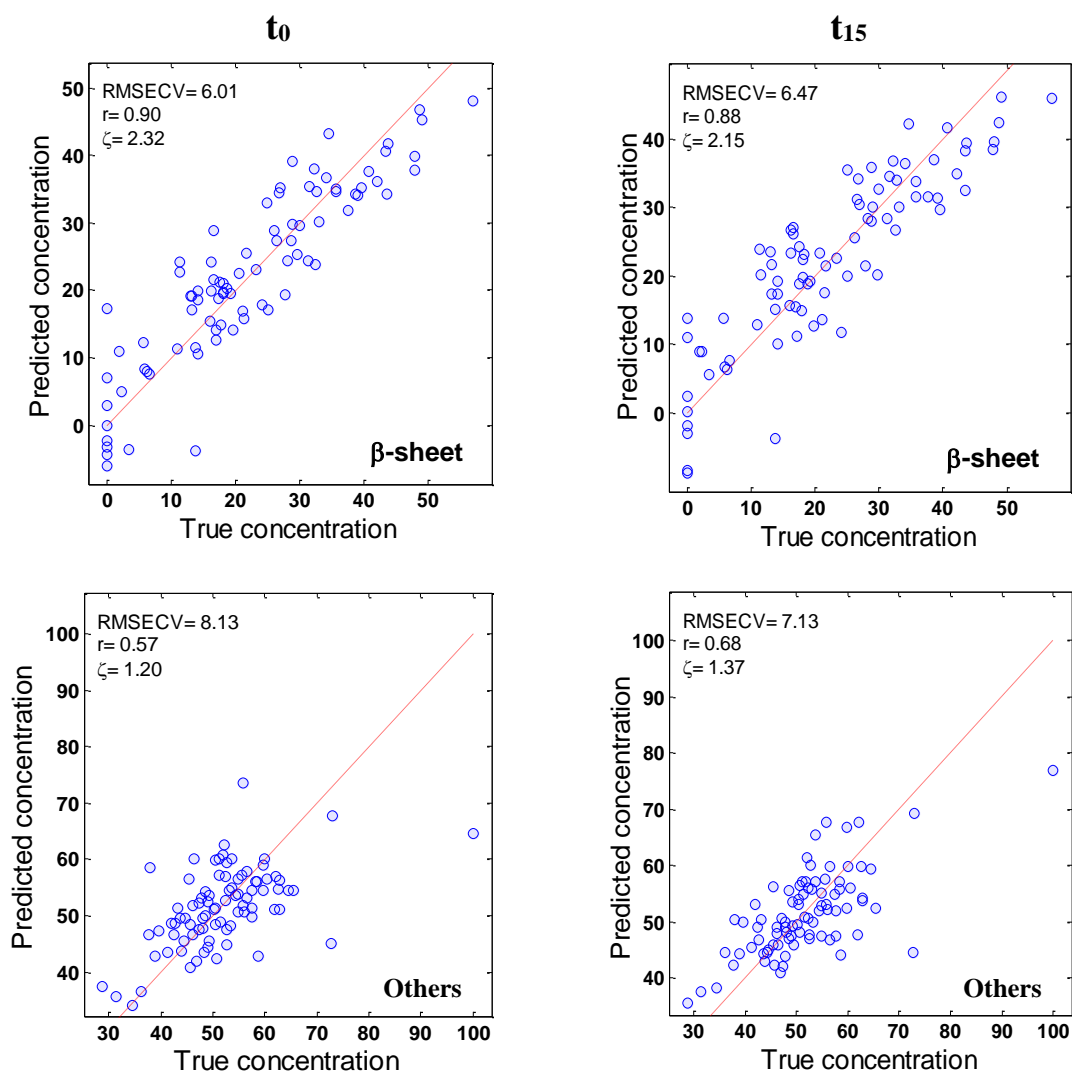

Figure S3: Relation between predicted  $\beta$ -sheet (top row) and "Others" (bottom row) structures obtained by PLS and actual "true" secondary structure content obtained after analysis of PDB-stored high resolution structures by DSSP. All concentrations are reported in %. The left column refers to results obtained at deuteration time  $t_0$  and the right column at  $t_{15}$ . Each circle in the graphs represents a protein. RMSECV, correlation coefficient  $r$  and  $\zeta^{\text{RMSECV}}$  are reported in the inset.

**Figure S4: predicted versus actual secondary structure contents obtained by SVM**

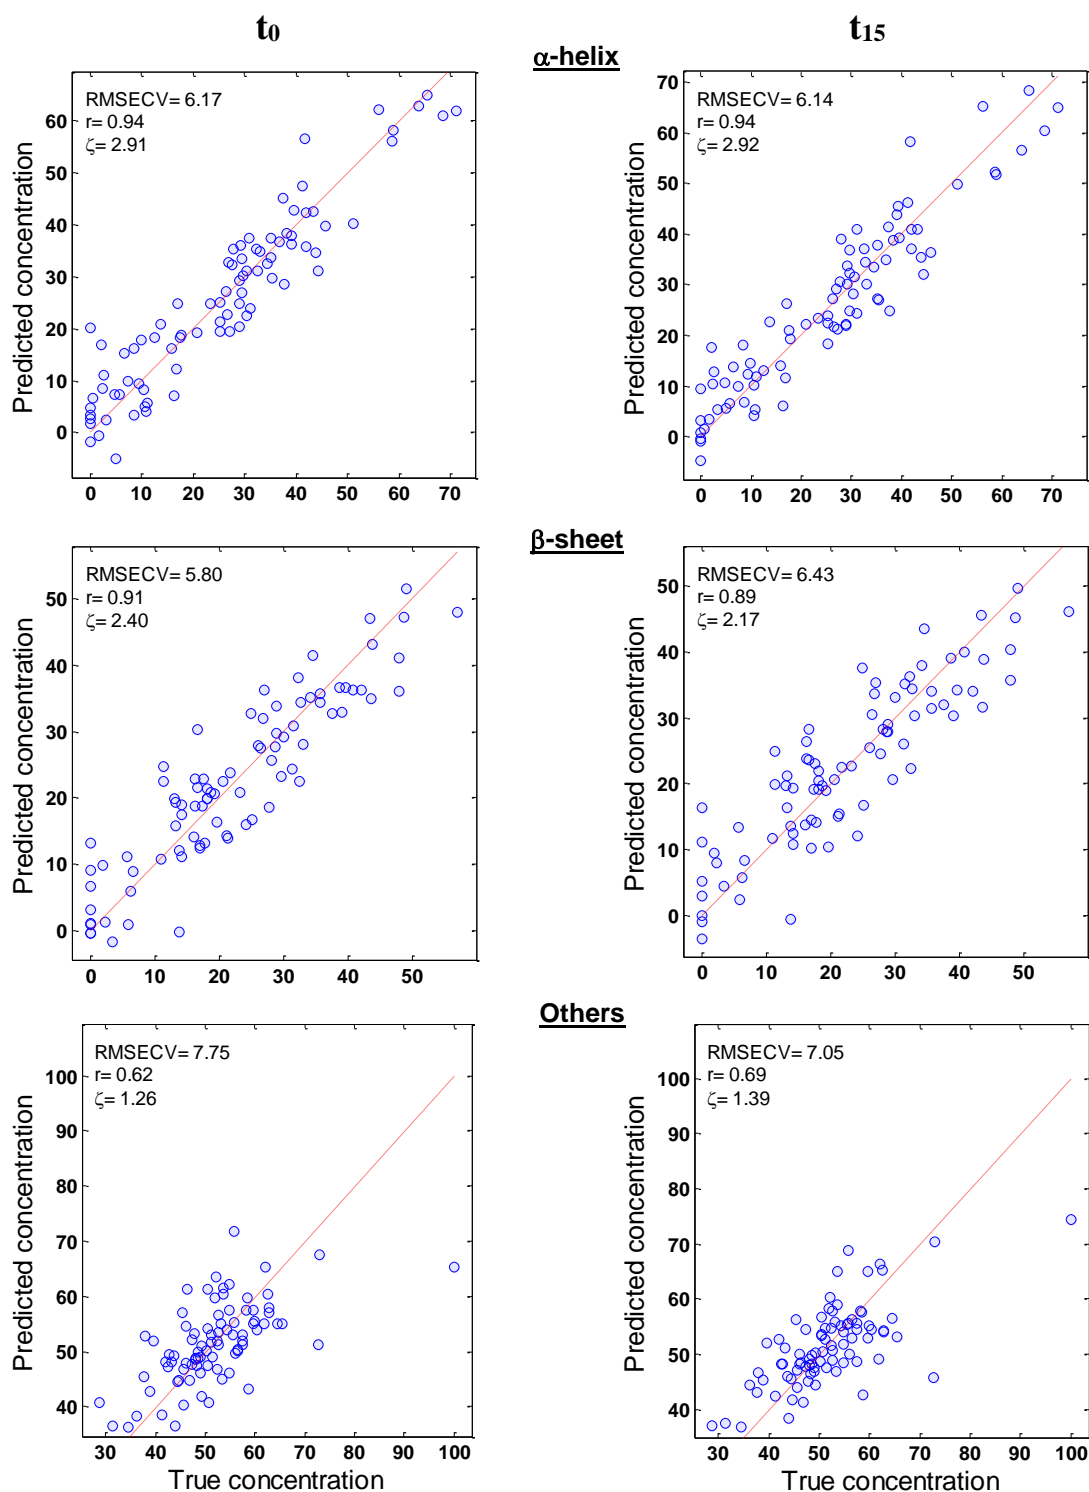

Figure S4: Relation between predicted  $\alpha$ -helix (top row),  $\beta$ -sheet (middle) and “Others” (bottom row) structures obtained by SVM and actual (“True”) secondary structure content obtained after analysis of PDB-stored high resolution structures by DSSP. All concentrations are reported in %. The left column refers to results obtained at deuteration time  $t_0$  and the right column at  $t_{15}$ . Each circle in the graphs represents a protein. RMSECV, correlation coefficient  $r$  and  $\zeta$  are reported in the inset.

**Figure S5: ASLR determination of secondary structures**

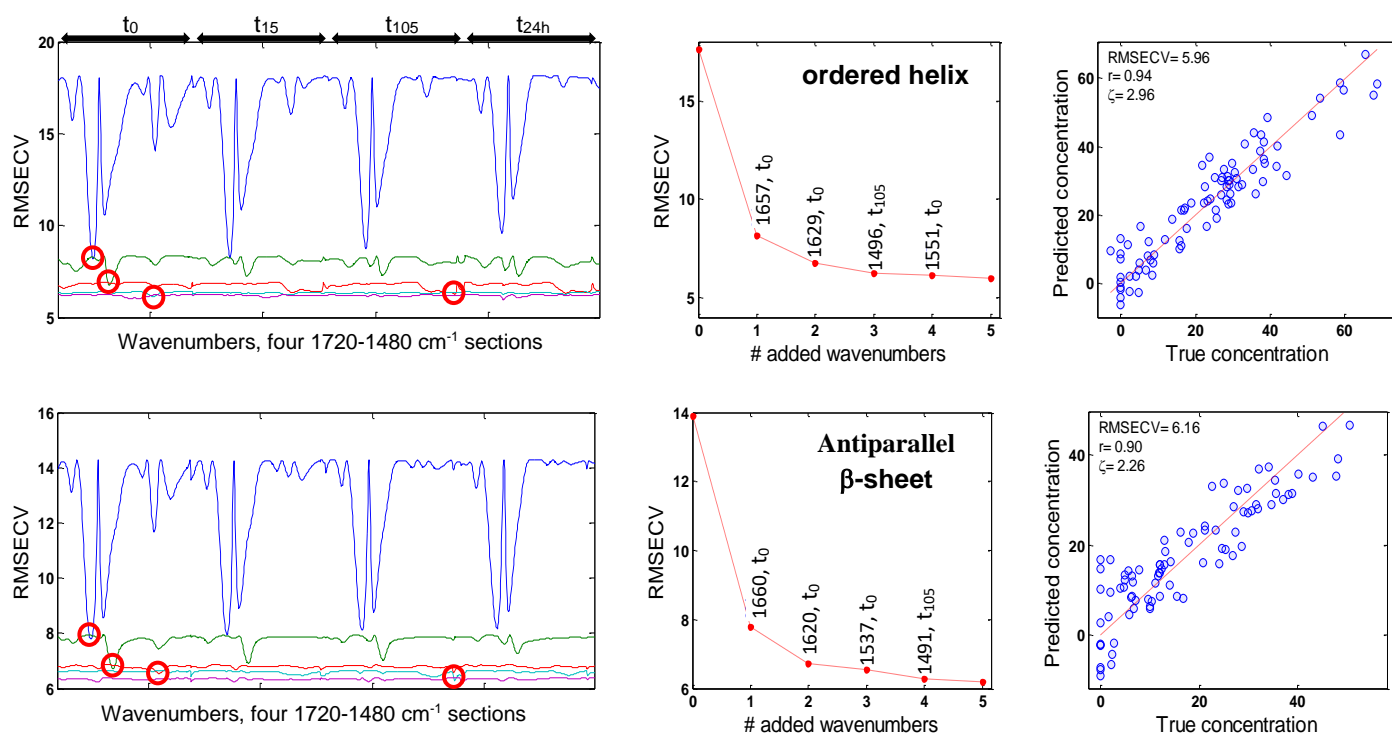

Figure S5: ascending stepwise linear regression. Top, ordered helix; bottom, antiparallel  $\beta$ -sheet. The left column presents the profile of the RMSECV (expressed in % of the structure content) when a single wavenumber is used (blue line), when a second is added (green line), a third one (red line), a fourth one (cyan) and a fifth one (magenta). For each curve, the value of the minimum with the corresponding wavenumber is reported in the middle column. The right column reports the predicted secondary structure content as a function of the actual content for each structure. The red diagonal line reflects a situation where prediction is perfect. All four deuteration time periods indicated on top of the left columns were used simultaneously. The best wavenumbers identified by a red circle are reported in the middle column.
